# Supplementary material for: Large-scale deployment of a rice 6 K SNP array for genetics and breeding applications
Source: PubMed Central journal article supplement (PMC5577349; doi:10.1186/s12284-017-0181-2), 2017-08-30
Supplement: 12284_2017_181_MOESM1_ESM.pdf [file 12284_2017_181_MOESM1_ESM.pdf]

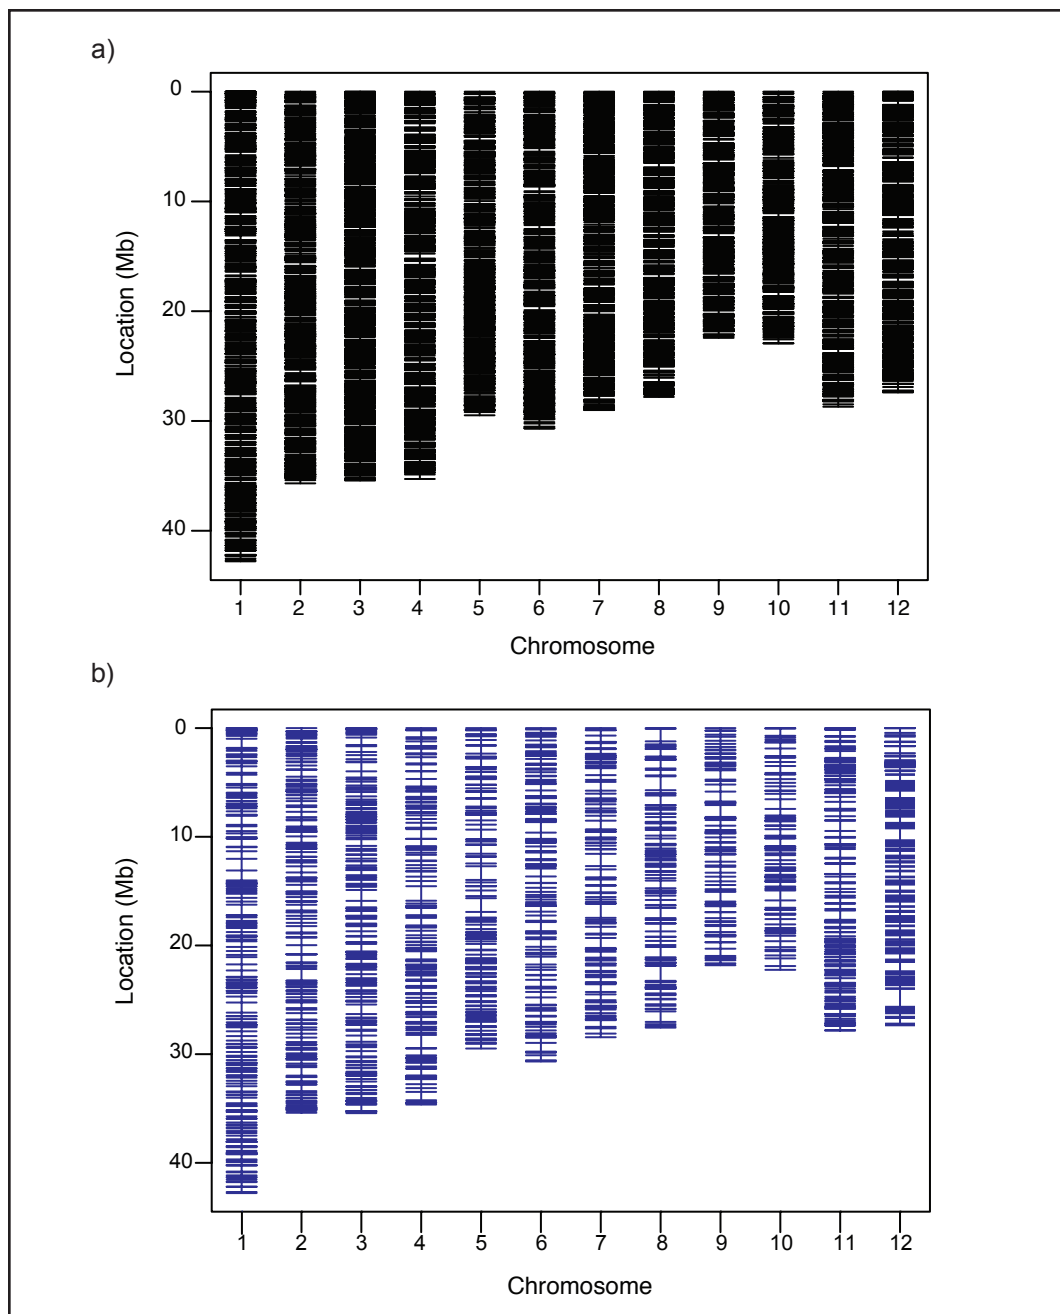

**Figure S1. Genome-wide marker coverage.** a) Distribution of 5,274 markers successfully converted from C6AIR, and b) distribution of 1,695 markers that localize within an MSUv7 gene models.
