# Supplementary material for: Large-scale deployment of a rice 6 K SNP array for genetics and breeding applications
Source: PubMed Central journal article supplement (PMC5577349; doi:10.1186/s12284-017-0181-2), 2017-08-30
Supplement: 12284_2017_181_MOESM2_ESM.pdf [file 12284_2017_181_MOESM2_ESM.pdf]

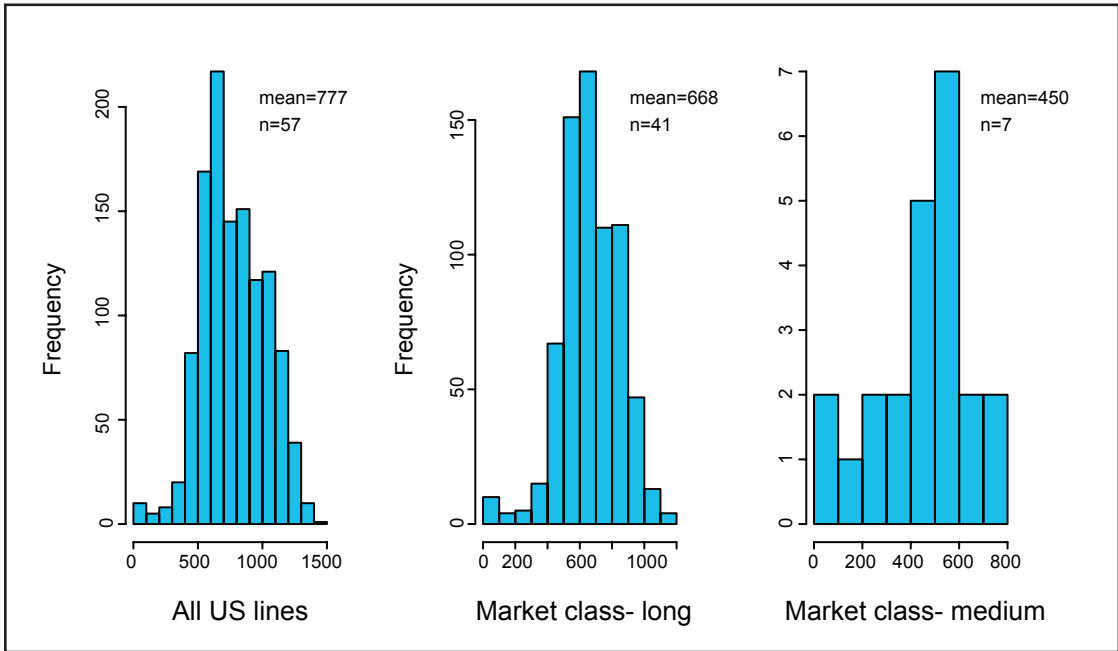

**Figure S2. Distribution of the number of polymorphic markers found in pairwise comparisons across US rice germplasm.** Number of polymorphic SNPs/pairwise comparison shown along the x-axis and its count along the y-axis. Panels display the following groups: a) All US lines pairwise comparisons (n= 57), b) Market class long grain (n=41), c) Market class medium grain (n=7).
