# Supplementary material for: Large-scale deployment of a rice 6 K SNP array for genetics and breeding applications
Source: PubMed Central journal article supplement (PMC5577349; doi:10.1186/s12284-017-0181-2), 2017-08-30
Supplement: 12284_2017_181_MOESM3_ESM.pdf [file 12284_2017_181_MOESM3_ESM.pdf]

Table S1. Germplasm information

A. *O. sativa* accessions

| S. No | IRGC ID | NSF ID   | GSOR ID     | Accession name        | Species          | Subpopulation   | Country                   | Institute |
|-------|---------|----------|-------------|-----------------------|------------------|-----------------|---------------------------|-----------|
| 1     |         |          |             | Ambemohar             | <i>O. sativa</i> | <i>aromatic</i> | India                     | CU        |
| 2     | 177     |          |             | Addey selection       | <i>O. sativa</i> | <i>aromatic</i> | India                     | IRRI      |
| 3     | 121899  |          |             | Basmati_370           | <i>O. sativa</i> | <i>aromatic</i> | India                     | CU        |
| 4     | 117658  | NSFTV16  | GSOR301014  | Bico_Branco           | <i>O. sativa</i> | <i>aromatic</i> | Brazil                    | CU        |
| 5     |         |          |             | Dom Sofid             | <i>O. sativa</i> | <i>aromatic</i> | Iran                      | IRRI      |
| 6     |         |          |             | Firooz                | <i>O. sativa</i> | <i>aromatic</i> | Iran                      | IRRI      |
| 7     |         |          |             | Hashemi               | <i>O. sativa</i> | <i>aromatic</i> | Iran                      | IRRI      |
| 8     | 29262   |          |             | IRGC29262             | <i>O. sativa</i> | <i>aromatic</i> | Bangladesh                | IRRI      |
| 9     | 29387   |          |             | IRGC29387             | <i>O. sativa</i> | <i>aromatic</i> | Bangladesh                | IRRI      |
| 10    |         |          |             | Nova                  | <i>O. sativa</i> | <i>aromatic</i> | United States             | IRRI      |
| 11    |         |          |             | Sadri                 | <i>O. sativa</i> | <i>aromatic</i> | Iran                      | IRRI      |
| 12    | 117872  | NSFTV221 | GSOR 301212 | Sadri_Belyi           | <i>O. sativa</i> | <i>aromatic</i> | Azerbaijan                | CU        |
| 13    | 117878  |          | GSOR 301356 | Sathi_Basmati         | <i>O. sativa</i> | <i>aromatic</i> | Pakistan                  | CU        |
| 14    |         |          |             | Aus 257               | <i>O. sativa</i> | <i>aus</i>      | Bangladesh                | IRRI      |
| 15    |         |          |             | Aus 299               | <i>O. sativa</i> | <i>aus</i>      | Bangladesh                | IRRI      |
| 16    |         |          |             | Aus 304               | <i>O. sativa</i> | <i>aus</i>      | Bangladesh                | IRRI      |
| 17    | 36983   |          |             | Ausboro               | <i>O. sativa</i> | <i>aus</i>      | Bangladesh                | IRRI      |
| 18    | 117711  | NSFTV317 | GSOR 301307 | DJ123                 | <i>O. sativa</i> | <i>aus</i>      | Bangladesh                | CU        |
| 19    |         |          |             | Dular                 | <i>O. sativa</i> | <i>aus</i>      | Bangladesh/India/Pakistan | IRRI      |
| 20    |         |          |             | DV85                  | <i>O. sativa</i> | <i>aus</i>      | Bangladesh                | IRRI      |
| 21    |         |          |             | DV86                  | <i>O. sativa</i> | <i>aus</i>      | Bangladesh                | IRRI      |
| 22    |         |          |             | DZ192                 | <i>O. sativa</i> | <i>aus</i>      | Bangladesh                | IRRI      |
| 23    |         |          |             | FR13A                 | <i>O. sativa</i> | <i>aus</i>      | India                     | IRRI      |
| 24    | 11484   |          |             | IRGC11484             | <i>O. sativa</i> | <i>aus</i>      | India                     | IRRI      |
| 25    | 21223   |          |             | IRGC21223             | <i>O. sativa</i> | <i>aus</i>      | India                     | IRRI      |
| 26    | 25841   |          |             | IRGC25841             | <i>O. sativa</i> | <i>aus</i>      | Bangladesh                | IRRI      |
| 27    | 25847   |          |             | IRGC25847             | <i>O. sativa</i> | <i>aus</i>      | Bangladesh                | IRRI      |
| 28    | 27041   |          |             | IRGC27041             | <i>O. sativa</i> | <i>aus</i>      | Indonesia                 | IRRI      |
| 29    | 27564   |          |             | IRGC27564             | <i>O. sativa</i> | <i>aus</i>      | Bangladesh                | IRRI      |
| 30    | 28943   |          |             | IRGC28943             | <i>O. sativa</i> | <i>aus</i>      | Bangladesh                | IRRI      |
| 31    | 29086   |          |             | IRGC29086             | <i>O. sativa</i> | <i>aus</i>      | Bangladesh                | IRRI      |
| 32    | 29442   |          |             | IRGC29442             | <i>O. sativa</i> | <i>aus</i>      | Bangladesh                | IRRI      |
| 33    | 6613    |          |             | IRGC6613              | <i>O. sativa</i> | <i>aus</i>      | Bangladesh                | IRRI      |
| 34    | 117769  | NSFTV78  | GSOR 301071 | Jhona349              | <i>O. sativa</i> | <i>aus</i>      | India                     | CU        |
| 35    |         |          |             | Kal Shoni             | <i>O. sativa</i> | <i>aus</i>      | Bangladesh                | IRRI      |
| 36    | 117617  | NSFTV85  | GSOR 301077 | Kasalath              | <i>O. sativa</i> | <i>aus</i>      | India                     | CU        |
| 37    | 117781  | NSFTV88  | GSOR 301080 | Khao_Gaew             | <i>O. sativa</i> | <i>aus</i>      | Thailand                  | CU        |
| 38    | 28017   |          |             | Kharsu 80A            | <i>O. sativa</i> | <i>aus</i>      | Pakistan                  | IRRI      |
| 39    |         |          |             | Lien Chan Sha Pu Tsan | <i>O. sativa</i> | <i>aus</i>      | China                     | IRRI      |
| 40    |         |          |             | N 22                  | <i>O. sativa</i> | <i>aus</i>      | India                     | IRRI      |
| 41    | 74769   |          |             | Nanhi                 | <i>O. sativa</i> | <i>aus</i>      | India                     | IRRI      |
| 42    |         |          |             | RAUSRR 5              | <i>O. sativa</i> | <i>aus</i>      | India                     | IRRI      |
| 43    |         |          |             | Rayada                | <i>O. sativa</i> | <i>aus</i>      | Bangladesh                | IRRI      |
| 44    | -       | NSFTV398 | GSOR301399* | 9311                  | <i>O. sativa</i> | <i>indica</i>   | China                     | CU        |
| 45    |         |          |             | A69-1                 | <i>O. sativa</i> | <i>indica</i>   | Philippines               | IRRI      |
| 46    | 117636  | NSFTV3   | GSOR 301003 | Ai-Chiao-Hong         | <i>O. sativa</i> | <i>indica</i>   | China                     | CU        |
| 47    |         |          |             | Apo                   | <i>O. sativa</i> | <i>indica</i>   | Philippines               | IRRI      |
| 48    |         |          |             | Arai Raj              | <i>O. sativa</i> | <i>indica</i>   | Bangladesh                | IRRI      |
| 49    | 77216   |          |             | Ashi Binni            | <i>O. sativa</i> | <i>indica</i>   | Bangladesh                | IRRI      |
| 50    |         |          |             | Aswina                | <i>O. sativa</i> | <i>indica</i>   | Bangladesh                | IRRI      |
| 51    | 83309   |          |             | Basmati 306           | <i>O. sativa</i> | <i>indica</i>   | India                     | IRRI      |
| 52    |         |          |             | BG 1222               | <i>O. sativa</i> | <i>indica</i>   | Sri Lanka                 | IRRI      |
| 53    |         |          |             | BINA Dhan-10          | <i>O. sativa</i> | <i>indica</i>   | Bangladesh                | IRRI      |
| 54    |         |          |             | BINA Dhan-7           | <i>O. sativa</i> | <i>indica</i>   | Bangladesh                | IRRI      |
| 55    | 6550    |          |             | Birain 360            | <i>O. sativa</i> | <i>indica</i>   | Bangladesh                | IRRI      |
| 56    |         |          |             | BR 11                 | <i>O. sativa</i> | <i>indica</i>   | Bangladesh                | IRRI      |
| 57    |         |          |             | BR 28                 | <i>O. sativa</i> | <i>indica</i>   | Bangladesh                | IRRI      |
| 58    |         |          |             | BRR1 DHAN 53          | <i>O. sativa</i> | <i>indica</i>   | Bangladesh                | IRRI      |
| 59    |         |          |             | CAS 209               | <i>O. sativa</i> | <i>indica</i>   | Senegal                   | IRRI      |
| 60    |         |          |             | Ciherang              | <i>O. sativa</i> | <i>indica</i>   | Indonesia                 | IRRI      |
| 61    | 117454  |          | GSOR301524  | CO39                  | <i>O. sativa</i> | <i>indica</i>   | India                     | CU        |
| 62    |         |          |             | CR dhan 405           | <i>O. sativa</i> | <i>indica</i>   | Philippines               | IRRI      |
| 63    |         |          |             | CR1009                | <i>O. sativa</i> | <i>indica</i>   | India                     | IRRI      |
| 64    |         |          |             | Dasanbyeon            | <i>O. sativa</i> | <i>indica</i>   | South Korea               | IRRI      |
| 65    | 117705  | NSFTV43  | GSOR 301040 | Dee_Geo_Woo_Gen       | <i>O. sativa</i> | <i>indica</i>   | Taiwan                    | CU        |
| 66    |         |          |             | Digang                | <i>O. sativa</i> | <i>indica</i>   |                           | CU        |
| 67    |         |          |             | Fedearroz 50          | <i>O. sativa</i> | <i>indica</i>   | Colombia                  | IRRI      |
| 68    |         |          |             | FL478                 | <i>O. sativa</i> | <i>indica</i>   | Philippines               | IRRI      |
| 69    |         |          |             | Hanareum              | <i>O. sativa</i> | <i>indica</i>   | South Korea               | IRRI      |
| 70    |         |          |             | Hanareumbyeon         | <i>O. sativa</i> | <i>indica</i>   | South Korea               | IRRI      |
| 71    | 5642    |          |             | Hom Nang Nouane       | <i>O. sativa</i> | <i>indica</i>   | Lao PDR                   | IRRI      |
| 72    | 120     |          |             | I Geo Tze             | <i>O. sativa</i> | <i>indica</i>   | Taiwan                    | IRRI      |
| 73    |         |          |             | IR 49830              | <i>O. sativa</i> | <i>indica</i>   | Philippines               | IRRI      |

| S. No | IRGC ID | NSF ID   | GSOR ID     | Accession name     | Species   | Subpopulation             | Country                 | Institute |
|-------|---------|----------|-------------|--------------------|-----------|---------------------------|-------------------------|-----------|
| 74    |         |          |             | IR 55179-3B-11-3   | O. sativa | <i>indica</i>             | Philippines             | IRRI      |
| 75    |         |          |             | IR24               | O. sativa | <i>indica</i>             | Philippines             | IRRI      |
| 76    |         |          |             | IR29               | O. sativa | <i>indica</i>             | Philippines             | IRRI      |
| 77    | 117268  | NSFTV612 | GSOR301401  | IR64               | O. sativa | <i>indica</i>             | Philippines             | CU        |
| 78    |         |          |             | IR65               | O. sativa | <i>indica</i>             | Philippines             | IRRI      |
| 79    |         |          |             | IRBB13             | O. sativa | <i>indica</i>             | Philippines             | IRRI      |
| 80    | A7484   |          |             | IRBB21             | O. sativa | <i>indica</i>             | Philippines             | IRRI      |
| 81    |         |          |             | IRBB5              | O. sativa | <i>indica</i>             | Philippines             | IRRI      |
| 82    |         |          |             | IRBB59             | O. sativa | <i>indica</i>             | Philippines             | IRRI      |
| 83    | 115114  |          |             | IRBB62             | O. sativa | <i>indica</i>             | Philippines             | IRRI      |
| 84    |         |          |             | IRBB7              | O. sativa | <i>indica</i>             | Philippines             | IRRI      |
| 85    |         |          |             | IRRI 104           | O. sativa | <i>indica</i>             | Philippines             | IRRI      |
| 86    |         |          |             | IRRI 174           | O. sativa | <i>indica</i>             | Philippines             | IRRI      |
| 87    | 301406  | NSFTV620 |             | Jasmine85          | O. sativa | <i>indica</i>             | Philippines             | CU        |
| 88    | 61381   |          |             | Kaolack            | O. sativa | <i>indica</i>             | Guinea                  | IRRI      |
| 89    | 88335   |          |             | Khao Hlan On       | O. sativa | <i>indica</i>             | Myanmar                 | IRRI      |
| 90    | 88336   |          |             | Khao Mine Lar      | O. sativa | <i>indica</i>             | Myanmar                 | IRRI      |
| 91    |         |          |             | Komboka            | O. sativa | <i>indica</i>             | Philippines             | IRRI      |
| 92    |         |          |             | Lota Sail          | O. sativa | <i>indica</i>             | Bangladesh              | IRRI      |
| 93    | 60184   |          |             | Ma-Zhan Red        | O. sativa | <i>indica</i>             | China                   | IRRI      |
| 94    | 15333   |          |             | Madabaru           | O. sativa | <i>indica</i>             | Sri Lanka               | IRRI      |
| 95    |         |          |             | Makalioka 34       | O. sativa | <i>indica</i>             | Madagascar              | IRRI      |
| 96    |         |          |             | Makassane          | O. sativa | <i>indica</i>             | Philippines             | IRRI      |
| 97    | 497625  |          |             | Matatag 1          | O. sativa | <i>indica</i>             | Philippines             | IRRI      |
| 98    |         |          |             | Milyang 23         | O. sativa | <i>indica</i>             | North/South Korea       | IRRI      |
| 99    |         |          |             | Minghui 63         | O. sativa | <i>indica</i>             | China                   | IRRI      |
| 100   | 33421   |          |             | Myotaw             | O. sativa | <i>indica</i>             | Myanmar                 | IRRI      |
| 101   |         |          |             | Namwon 1           | O. sativa | <i>indica</i>             | South Korea             | IRRI      |
| 102   |         |          |             | NERICA_L19         | O. sativa | <i>indica</i>             | Benin/Senegal           | CU        |
| 103   |         |          |             | NERICA_L52         | O. sativa | <i>indica</i>             | Benin/Senegal           | CU        |
| 104   |         |          |             | Nona Bokra         | O. sativa | <i>indica</i>             | India                   | IRRI      |
| 105   | 1329424 |          |             | NSIC Rc 118        | O. sativa | <i>indica</i>             | Philippines             | IRRI      |
| 106   |         |          |             | NSIC Rc 158        | O. sativa | <i>indica</i>             | Philippines             | IRRI      |
| 107   |         |          |             | NSIC Rc 212        | O. sativa | <i>indica</i>             | Philippines             | IRRI      |
| 108   |         |          |             | NSIC Rc 222        | O. sativa | <i>indica</i>             | Philippines             | IRRI      |
| 109   |         |          |             | NSIC Rc 238        | O. sativa | <i>indica</i>             | Philippines             | IRRI      |
| 110   |         |          |             | Phka Rumduol       | O. sativa | <i>indica</i>             | Cambodia                | IRRI      |
| 111   |         |          |             | Pokkali            | O. sativa | <i>indica</i>             | india, sri lanka        | IRRI      |
| 112   |         |          |             | PSB Rc 18          | O. sativa | <i>indica</i>             | Philippines             | IRRI      |
| 113   |         |          |             | PSB Rc 82          | O. sativa | <i>indica</i>             | Philippines             | IRRI      |
| 114   |         |          |             | Sadu-Cho           | O. sativa | <i>indica</i>             | South Korea             | IRRI      |
| 115   |         |          |             | Samba Mahsuri      | O. sativa | <i>indica</i>             | India                   | IRRI      |
| 116   |         |          |             | Sanhuangzhan No 2  | O. sativa | <i>indica</i>             | China                   | IRRI      |
| 117   |         |          |             | Saro 5             | O. sativa | <i>indica</i>             | Tanzania                | IRRI      |
| 118   |         |          |             | Sundensis          | O. sativa | <i>indica</i>             | Kazakhstan              | IRRI      |
| 119   |         |          |             | Supa               | O. sativa | <i>indica</i>             | Kenya, Tanzania, Zambia | IRRI      |
| 120   |         |          |             | Swarna             | O. sativa | <i>indica</i>             | India                   | IRRI      |
| 121   |         |          |             | Shufeng            | O. sativa | <i>indica</i>             | United States           | IRRI      |
| 122   | 117906  | NSFTV163 | GSOR 301154 | Taducan            | O. sativa | <i>indica</i>             | Philippines             | CU        |
| 123   |         |          |             | Tai                | O. sativa | <i>indica</i>             | Philippines             | IRRI      |
| 124   |         |          |             | Taichung Native 1  | O. sativa | <i>indica</i>             | Taiwan                  | IRRI      |
| 125   | 539463  |          |             | Teqing             | O. sativa | <i>indica</i>             | China                   | IRRI      |
| 126   |         |          |             | Tetep              | O. sativa | <i>indica</i>             | India                   | IRRI      |
| 127   |         |          |             | THADOKKHAM 1       | O. sativa | <i>indica</i>             | Lao PDR                 | IRRI      |
| 128   |         |          |             | TKM 6              | O. sativa | <i>indica</i>             | India                   | IRRI      |
| 129   | 69338   |          |             | TKM 9              | O. sativa | <i>indica</i>             | India                   | IRRI      |
| 130   |         |          |             | TSIPALA 421        | O. sativa | <i>indica</i>             | Madagascar              | IRRI      |
| 131   |         |          |             | TW 16              | O. sativa | <i>indica</i>             | Philippines             | IRRI      |
| 132   |         |          |             | Utri Merah         | O. sativa | <i>indica</i>             | Indonesia               | IRRI      |
| 133   |         |          |             | Vandana            | O. sativa | <i>indica</i>             | India                   | IRRI      |
| 134   | 52787   |          |             | Vishunparag        | O. sativa | <i>aus</i>                | India                   | IRRI      |
| 135   |         |          |             | Vuninzara          | O. sativa | <i>indica</i>             | Philippines             | IRRI      |
| 136   |         |          |             | WAS 207-B-B-3-1-1  | O. sativa | <i>indica</i>             | Senegal                 | IRRI      |
| 137   |         |          |             | Zhenshan S-97B     | O. sativa | <i>indica</i>             | China                   | IRRI      |
| 138   |         |          |             | Giza 178           | O. sativa | <i>indica</i>             | Egypt                   | IRRI      |
| 139   |         |          |             | Asominori          | O. sativa | <i>temperate japonica</i> | South Korea             | IRRI      |
| 140   |         |          |             | Baghlani Nangarhar | O. sativa | <i>temperate japonica</i> | Afghanistan             | IRRI      |
| 141   |         |          |             | Dobong             | O. sativa | <i>temperate japonica</i> | South Korea             | IRRI      |
| 142   | 117612  | NSFTV56  | GSOR 301052 | Geumobyeo          | O. sativa | <i>temperate japonica</i> | Republic of Korea       | CU        |
| 143   | 19868   |          |             | IRGC19868          | O. sativa | <i>temperate japonica</i> | South Korea             | IRRI      |
| 144   |         |          |             | Jinmibyeo          | O. sativa | <i>temperate japonica</i> | South Korea             | IRRI      |
| 145   |         |          |             | K 3                | O. sativa | <i>temperate japonica</i> | Cambodia                | IRRI      |
| 146   |         |          |             | Kamenoo            | O. sativa | <i>temperate japonica</i> | Japan                   | IRRI      |
| 147   |         |          |             | Koryeong13         | O. sativa | <i>temperate japonica</i> | South Korea             | IRRI      |
| 148   |         |          |             | Koshihikari        | O. sativa | <i>temperate japonica</i> | Japan                   | IRRI      |

| S. No | IRGC ID | NSF ID   | GSOR ID     | Accession name       | Species   | Subpopulation      | Country                      | Institute |
|-------|---------|----------|-------------|----------------------|-----------|--------------------|------------------------------|-----------|
| 149   |         |          |             | Lijiangxintuanheigu  | O. sativa | temperate japonica | China                        | IRRI      |
| 150   |         |          |             | MS 11                | O. sativa | temperate japonica | Philippines                  | IRRI      |
| 151   | 121592  | NSFTV173 | GSOR 301164 | Nipponbare           | O. sativa | temperate japonica | Japan                        | CU        |
| 152   |         |          |             | Nonganbyeo           | O. sativa | temperate japonica | South Korea                  | IRRI      |
| 153   |         |          |             | Samnam               | O. sativa | temperate japonica | South Korea                  | IRRI      |
| 154   |         |          |             | Taichung 65          | O. sativa | temperate japonica | Taiwan                       | IRRI      |
| 155   |         |          |             | Tainung 67           | O. sativa | temperate japonica | Taiwan                       | IRRI      |
| 156   |         |          |             | Tong 88-7            | O. sativa | temperate japonica | China                        | IRRI      |
| 157   |         |          |             | Toploea 70/76        | O. sativa | temperate japonica | Romania                      | IRRI      |
| 158   |         |          |             | Toyonishiki          | O. sativa | temperate japonica | Japan                        | IRRI      |
| 159   |         |          |             | TR22183              | O. sativa | temperate japonica | China                        | IRRI      |
| 160   |         |          |             | Unkwangbyeo          | O. sativa | temperate japonica | South Korea                  | IRRI      |
| 161   |         |          |             | Yukishikari          | O. sativa | temperate japonica | Japan                        | CU        |
| 162   | 126381  | NSFTV7   | GSOR 301007 | Arias                | O. sativa | tropical japonica  | Indonesia                    | CU        |
| 163   | 117264  | NSFTV174 |             | Azucena              | O. sativa | tropical japonica  | Philippines                  | CU        |
| 164   |         | NSFTV622 |             | Bengal               | O. sativa | tropical japonica  | United States                | CU        |
| 165   |         |          |             | Binirao              | O. sativa | tropical japonica  | Philippines                  | IRRI      |
| 166   |         | NSFTV182 |             | Blue Rose Supreme    | O. sativa | tropical japonica  | United States                | CU        |
| 167   |         |          |             | Bowman               | O. sativa | tropical japonica  | United States                | CU        |
| 168   |         |          |             | Caffey               | O. sativa | tropical japonica  | United States                | CU        |
| 169   | 121302  |          |             | Caiapo               | O. sativa | tropical japonica  | Brazil                       | CU        |
| 170   |         | NSFTV24  |             | Carolina Gold        | O. sativa | tropical japonica  | United States                | CU        |
| 171   |         | NSFTV25  |             | Carolina Gold        | O. sativa | tropical japonica  | United States                | CU        |
| 172   |         |          |             | Carolina Gold Select | O. sativa | tropical japonica  | United States                | CU        |
| 173   |         |          |             | Catahoula            | O. sativa | tropical japonica  | United States                | CU        |
| 174   |         |          |             | CHAHORA 144          | O. sativa | tropical japonica  | Pakistan                     | IRRI      |
| 175   |         |          |             | Cheniere             | O. sativa | tropical japonica  | United States                | CU        |
| 176   |         |          |             | CL111                | O. sativa | tropical japonica  | United States                | CU        |
| 177   |         |          |             | CL131                | O. sativa | tropical japonica  | United States                | CU        |
| 178   |         |          |             | CL151                | O. sativa | tropical japonica  | United States                | CU        |
| 179   |         |          |             | CL152                | O. sativa | tropical japonica  | United States                | CU        |
| 180   |         |          |             | CL261                | O. sativa | tropical japonica  | United States                | CU        |
| 181   |         | NSFTV396 |             | Cocodrie             | O. sativa | tropical japonica  | United States                | CU        |
| 182   |         |          |             | Curinga              | O. sativa | tropical japonica  | Brazil                       | CU        |
| 183   | 117699  | NSFTV397 | GSOR 301380 | Cybonnet             | O. sativa | tropical japonica  | United States                | CU        |
| 184   |         |          |             | Cypress              | O. sativa | tropical japonica  | United States                | CU        |
| 185   |         | NSFTV391 |             | Della                | O. sativa | tropical japonica  | United States                | CU        |
| 186   |         |          |             | DixieBelle           | O. sativa | tropical japonica  | United States                | CU        |
| 187   |         | NSFTV54  |             | Fortuna (Stuttgart)  | O. sativa | tropical japonica  | United States                | CU        |
| 188   |         | NSFTV632 |             | Francis              | O. sativa | tropical japonica  | United States                | CU        |
| 189   |         |          |             | Gogo Lempuk          | O. sativa | tropical japonica  | Indonesia                    | IRRI      |
| 190   |         |          |             | Hidalgo              | O. sativa | tropical japonica  | United States                | CU        |
| 191   |         |          |             | Jackson              | O. sativa | tropical japonica  | United States                | CU        |
| 192   |         |          |             | Jazzman (Anna)       | O. sativa | tropical japonica  | United States                | CU        |
| 193   |         |          |             | Jazzman2             | O. sativa | tropical japonica  | United States                | CU        |
| 194   | 126385  | NSFTV628 |             | Jefferson            | O. sativa | tropical japonica  | United States                | CU        |
| 195   |         |          |             | Jupiter              | O. sativa | tropical japonica  | United States                | CU        |
| 196   | 6732    |          |             | Kay Noi Leuang       | O. sativa | tropical japonica  | Lao PDR                      | IRRI      |
| 197   |         | NSFTV624 |             | Kaybonnet            | O. sativa | tropical japonica  | United States                | CU        |
| 198   |         |          |             | Kinandang Patong     | O. sativa | tropical japonica  | Philippines                  | IRRI      |
| 199   |         |          |             | L-202                | O. sativa | tropical japonica  | United States                | CU        |
| 200   |         |          |             | L-202                | O. sativa | tropical japonica  | United States                | CU        |
| 201   |         | NSFTV621 |             | Lagru                | O. sativa | tropical japonica  | United States                | CU        |
| 202   |         |          |             | Lebonnet             | O. sativa | tropical japonica  | United States                | CU        |
| 203   |         | NSFTV101 |             | Lemont               | O. sativa | tropical japonica  | United States                | CU        |
| 204   |         |          |             | M 202                | O. sativa | tropical japonica  | United States                | IRRI      |
| 205   | 19451   |          |             | Malagkit Puti        | O. sativa | tropical japonica  | Philippines                  | IRRI      |
| 206   |         |          |             | Malagkit Sinaguing   | O. sativa | tropical japonica  | Philippines                  | IRRI      |
| 207   |         |          |             | Maybelle             | O. sativa | tropical japonica  | United States                | CU        |
| 208   |         |          |             | Medark               | O. sativa | tropical japonica  | United States                | CU        |
| 209   |         |          |             | Mermentau            | O. sativa | tropical japonica  | United States                | CU        |
| 210   | 117621  | NSFTV108 |             | Moroberekan          | O. sativa | tropical japonica  | Guinea                       | CU        |
| 211   |         |          |             | Neptune              | O. sativa | tropical japonica  | United States                | CU        |
| 212   |         |          |             | N 12                 | O. sativa | tropical japonica  | India                        | IRRI      |
| 213   |         |          |             | NERICA_3             | O. sativa | tropical japonica  | Benin/Senegal                | CU        |
| 214   |         |          |             | NERICA_4             | O. sativa | tropical japonica  | Benin/Senegal                | CU        |
| 215   |         |          |             | NERICA_5             | O. sativa | tropical japonica  | Benin/Senegal                | CU        |
| 216   |         |          |             | Newbonnet            | O. sativa | tropical japonica  | United States                | CU        |
| 217   |         |          |             | Newrex               | O. sativa | tropical japonica  | United States                | CU        |
| 218   |         |          |             | PI 298967-1          | O. sativa | tropical japonica  | Australia                    | IRRI      |
| 219   |         |          |             | Pirogue              | O. sativa | japonica           | United States                | IRRI      |
| 220   |         |          |             | Presidio             | O. sativa | tropical japonica  | United States                | CU        |
| 221   |         |          |             | PSAT                 | O. sativa | tropical japonica  | Thailand                     | CU        |
| 222   |         |          |             | Rinaldo Bersani      | O. sativa | tropical japonica  | Turkey, Spain, Italy, France | IRRI      |
| 223   |         |          |             | S4542A3-49B-2B12     | O. sativa | tropical japonica  | United States                | IRRI      |
| 224   |         |          |             | Saber                | O. sativa | tropical japonica  | United States                | CU        |

| S. No | IRGC ID | NSF ID   | GSOR ID     | Accession name      | Species          | Subpopulation            | Country       | Institute |
|-------|---------|----------|-------------|---------------------|------------------|--------------------------|---------------|-----------|
| 225   |         |          |             | Sierra              | <i>O. sativa</i> | <i>tropical japonica</i> | United States | CU        |
| 226   |         |          |             | Taggart             | <i>O. sativa</i> | <i>tropical japonica</i> | United States | CU        |
| 227   |         |          |             | Tebonnet            | <i>O. sativa</i> | <i>tropical japonica</i> | United States | CU        |
| 228   | 117921  | NSFTV165 | GSOR 301156 | Trembese            | <i>O. sativa</i> | <i>tropical japonica</i> | Indonesia     | CU        |
| 229   |         |          |             | Trenasse            | <i>O. sativa</i> | <i>tropical japonica</i> | United States | CU        |
| 230   |         |          |             | WAB 706-3-4-K4-KB-1 | <i>O. sativa</i> | <i>tropical japonica</i> | Ivory Coast   | IRRI      |
| 231   |         |          |             | Wells               | <i>O. sativa</i> | <i>tropical japonica</i> | United States | CU        |
| 232   |         |          |             | YRL-1               | <i>O. sativa</i> | <i>tropical japonica</i> | Australia     | IRRI      |

#### B. *O. rufipogon* accessions

| S.No | IRGC ID | NSF ID   | GSOR ID | Accession name | Species                       | Subpopulation | Country          | Institute |
|------|---------|----------|---------|----------------|-------------------------------|---------------|------------------|-----------|
| 233  | 80742   | NSFTV407 | 407     |                | <i>O. rufipogon</i>           | W1            | Myanmar          | CU        |
| 234  | 105567  | NSFTV490 | 490     |                | <i>O. rufipogon</i>           | W1            | Indonesia        | CU        |
| 235  | 105942  | NSFTV512 | 512     |                | <i>O. rufipogon</i>           | W1            | Thailand         | CU        |
| 236  | 106412  | NSFTV539 | 539     |                | <i>O. rufipogon</i>           | W1            | Vietnam          | CU        |
| 237  | 105349  | NSFTV482 | 482     |                | <i>O. rufipogon</i>           | W2            | India            | CU        |
| 238  | 105375  | NSFTV483 | 483     |                | <i>O. rufipogon</i>           | W2            | Thailand         | CU        |
| 239  | 100211  | NSFTV666 | 666     |                | <i>O. rufipogon</i>           | W2            | India            | CU        |
| 240  | 106272  | NSFTV575 | 575     |                | <i>O. rufipogon</i>           | W3            | Papua New Guinea | CU        |
| 241  | 106273  | NSFTV576 | 576     |                | <i>O. rufipogon</i>           | W3            | Papua New Guinea | CU        |
| 242  | 106276  | NSFTV579 | 579     |                | <i>O. rufipogon</i>           | W3            | Papua New Guinea | CU        |
| 243  | 105491  | NSFTV488 | 488     |                | <i>O. rufipogon</i>           | W4            | Malaysia         | CU        |
| 244  | 100897  | NSFTV677 | 677     |                | <i>O. nivara</i>              | W4            | India            | CU        |
| 245  | 101967  | NSFTV691 | 691     |                | <i>O. nivara</i>              | W4            | India            | CU        |
| 246  | 105599  | NSFTV737 | 737     |                | <i>O. nivara</i>              | W4            | Thailand         | CU        |
| 247  | 106148  | NSFTV757 | 757     |                | <i>O. nivara</i>              | AdmixW4/W1    | Laos             | CU        |
| 248  | 81909   | NSFTV415 | 415     |                | <i>O. spontanea</i>           | W5            | India            | CU        |
| 249  | 93188   | NSFTV444 | 444     |                | <i>O. nivara</i>              | W5            | Nepal            | CU        |
| 250  | 102178  | NSFTV607 | 607     |                | <i>O. nivara</i>              | W5            | India            | CU        |
| 251  | 105400  | NSFTV485 | 485     |                | <i>O. rufipogon</i>           | W6            | China            | CU        |
|      |         |          |         |                | <i>O. rufipogon/O. nivara</i> | W6            | Taiwan           | CU        |
| 252  | 100907  | NSFTV604 | 604     |                | <i>O. rufipogon/O. nivara</i> | W6            | Taiwan           | CU        |
| 253  | 100593  | NSFTV669 | 669     |                | <i>O. nivara</i>              | W6            | Taiwan           | CU        |
| 254  |         | NSFTV763 | 763     |                | <i>O. rufipogon</i>           | W6            | China            | CU        |
| 255  | W1944*  | NSFTV766 | 766     |                | <i>O. rufipogon</i>           | W6            | China            | CU        |

#### C. Wild rice accession from different species

| S.No | IRGC no. or Genebank ID* | NSF ID   | GSOR ID | Accession name | Species                | Subpopulation | Country   | Institute |
|------|--------------------------|----------|---------|----------------|------------------------|---------------|-----------|-----------|
| 256  | 105220                   | NSFTV479 | 479     |                | <i>O. officinalis</i>  | outgroup      | Indonesia | CU        |
| 257  | 105564                   | NSFTV489 | 489     |                | <i>O. meridionalis</i> | outgroup      | Indonesia | CU        |
| 258  | W2121*                   |          | OR44    |                | <i>O. meridionalis</i> | outgroup      | Australia | CU        |
