# Supplementary material for: Large-scale deployment of a rice 6 K SNP array for genetics and breeding applications
Source: PubMed Central journal article supplement (PMC5577349; doi:10.1186/s12284-017-0181-2), 2017-08-30
Supplement: 12284_2017_181_MOESM4_ESM.pdf [file 12284_2017_181_MOESM4_ESM.pdf]

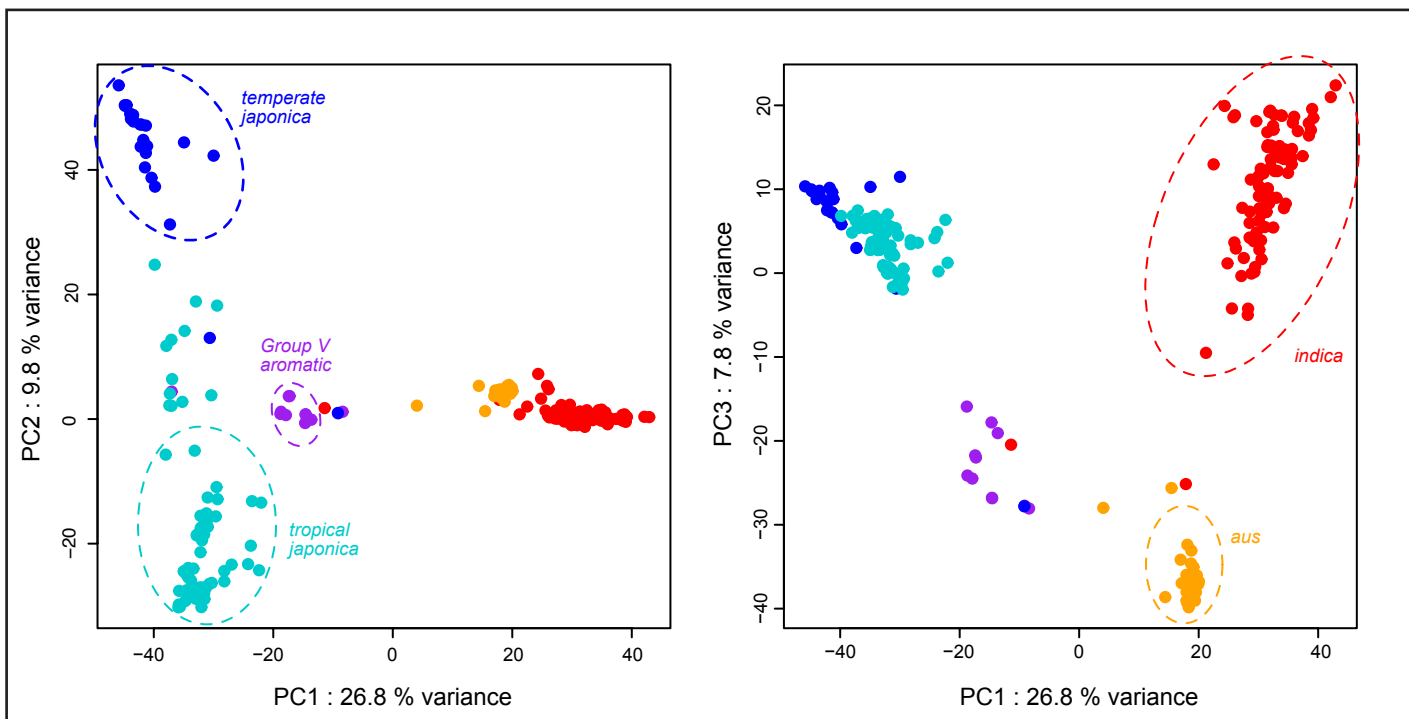

**Figure S3. Principal Components Analysis of diverse cultivated Asian rice accessions.** PCA of 232 *O. sativa* accessions. Colors indicate previously identified subpopulation membership (dark blue = *temperate japonica*, cyan = *tropical japonica*, purple = *aromatic*, red = *indica*, orange = *aus*). PC1 distinguishes the *Japonica* Varietal Group and the *Indica* Varietal Group, PC2 separates the *temperate japonica*, *tropical japonica* and *aromatic* populations; PC3 differentiates *indica* and *aus*.
