# Supplementary material for: Large-scale deployment of a rice 6 K SNP array for genetics and breeding applications
Source: PubMed Central journal article supplement (PMC5577349; doi:10.1186/s12284-017-0181-2), 2017-08-30
Supplement: 12284_2017_181_MOESM5_ESM.pdf [file 12284_2017_181_MOESM5_ESM.pdf]

**Figure S4.** Use of C6AIR for background selection during TR22183-Pup1 NIL development

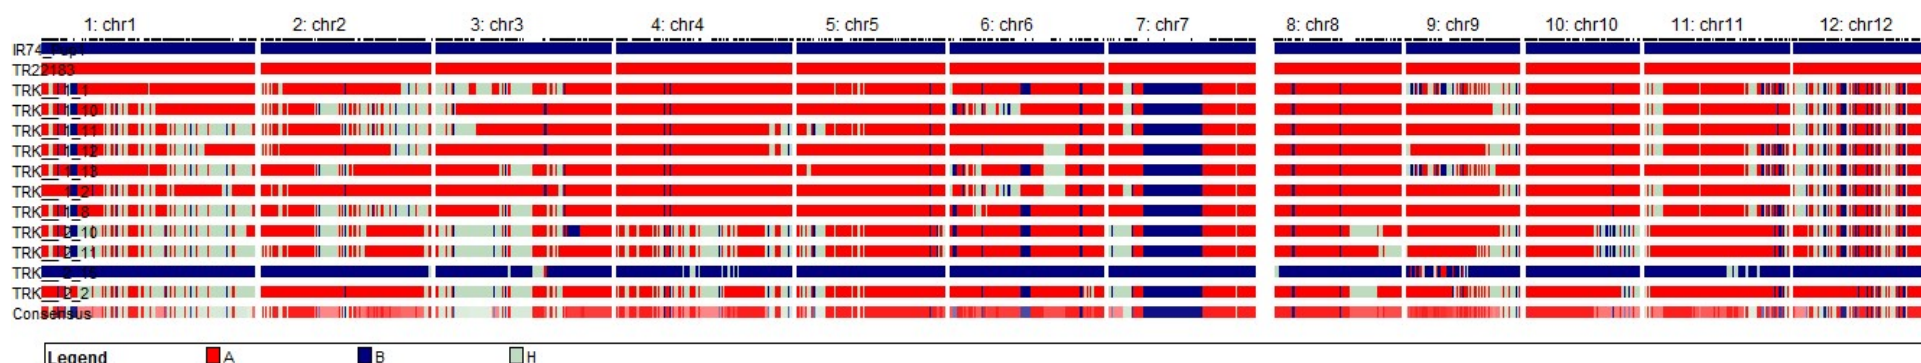

Graphical genotypes of selected BC2F1 of TR22183xIR74-Pup1 using 2055 polymorphic SNP markers. All selected plants were subjected to foreground genotyping using Pup1 major markers. Red color (A) indicates TR22183 segments, blue color (B) indicates donor introgression while light blue color (H) indicates heterozygosity.

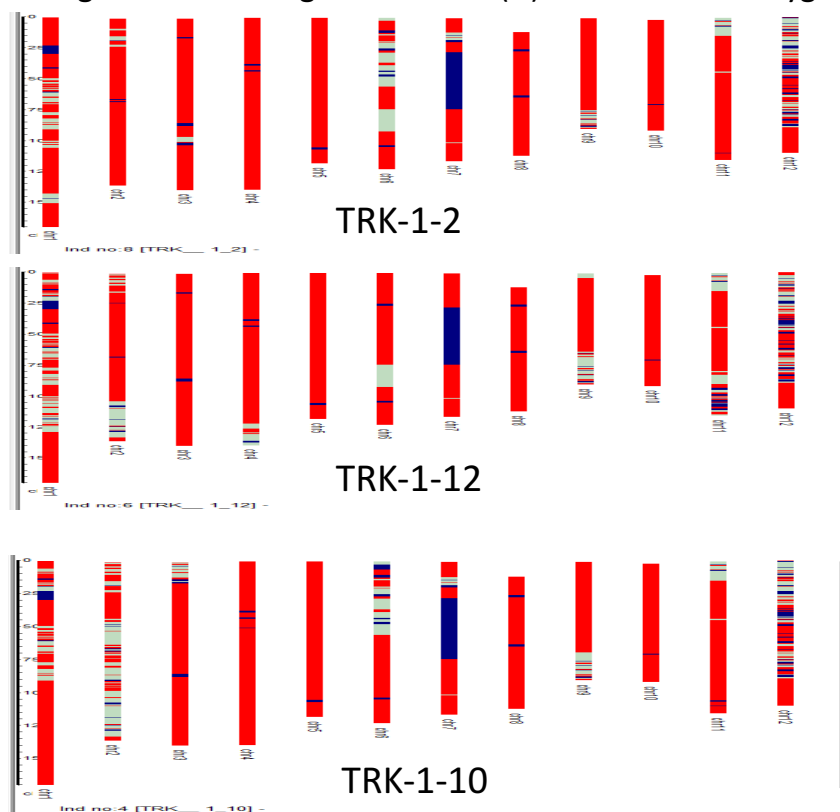

Graphical genotypes of the top 3 best BC2F1 plants in terms of percent recipient segment recovered.

|  | Alias     | A (%) | B (%) | H (%) | Total (cM) | Recombin | H-segments |
|--|-----------|-------|-------|-------|------------|----------|------------|
|  | TR22183   | 100   | 0     | 0     | 1438.7     | 0        | 0          |
|  | TRK-1-2   | 81.9  | 7.1   | 11    | 1438.7     | 230      | 84         |
|  | TRK-1-12  | 78.7  | 7.5   | 13.8  | 1438.7     | 284      | 107        |
|  | TRK-1-10  | 77.3  | 7.8   | 15    | 1438.7     | 303      | 118        |
|  | TRK-1-1   | 75.5  | 8.9   | 15.5  | 1438.7     | 344      | 132        |
|  | TRK-1-11  | 75.2  | 7.3   | 17.5  | 1438.7     | 320      | 131        |
|  | TRK-1-13  | 75.1  | 8.8   | 16.1  | 1438.7     | 324      | 121        |
|  | TRK-1-8   | 74    | 8.2   | 17.9  | 1438.7     | 323      | 126        |
|  | TRK-2-2   | 67.5  | 7     | 25.6  | 1438.7     | 355      | 148        |
|  | TRK-2-6   | 63.1  | 8.7   | 28.2  | 1438.7     | 430      | 182        |
|  | TRK-2-7   | 61.6  | 9.2   | 29.2  | 1438.7     | 456      | 193        |
|  | TRK-2-10  | 61.5  | 9.7   | 28.7  | 1438.7     | 435      | 181        |
|  | TRK-2-11  | 61.1  | 9     | 29.9  | 1438.7     | 454      | 192        |
|  | TRK-2-3   | 58.4  | 9.9   | 31.7  | 1438.7     | 434      | 181        |
|  | TRK-2-8   | 54.7  | 9.5   | 35.9  | 1438.7     | 506      | 216        |
|  | TRK-2-15  | 1     | 95.8  | 3.3   | 1438.7     | 85       | 32         |
|  | IR74 Pup1 | 0     | 100   | 0     | 1438.7     | 0        | 0          |

Genotypic summary statistics of the selected BC2F1.
