# Supplementary material for: Large-scale deployment of a rice 6 K SNP array for genetics and breeding applications
Source: PubMed Central journal article supplement (PMC5577349; doi:10.1186/s12284-017-0181-2), 2017-08-30
Supplement: 12284_2017_181_MOESM7_ESM.pdf [file 12284_2017_181_MOESM7_ESM.pdf]

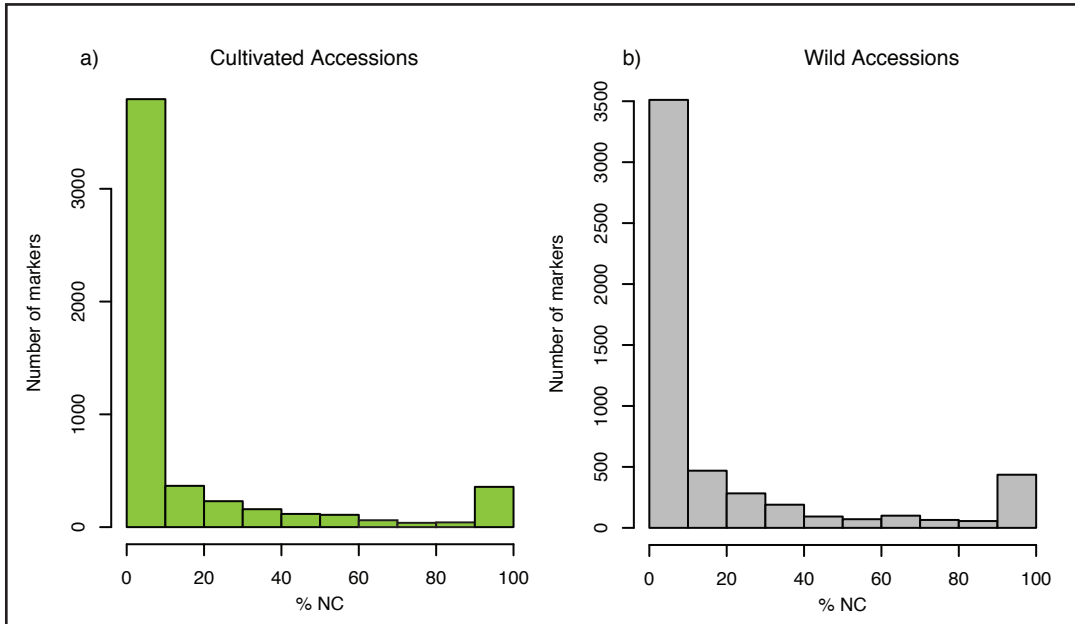

**Figure S5. Distribution of the frequency of "no call" (NC) alleles in (a) cultivated and (b) wild accessions using the Cornell 6k Array Infinium Rice.** There were 401 markers that have > 79% NC in cultivated and 472 markers in wild accessions. Both these groups shared 379 markers that gave > 79% no calls.
